# Supplementary material for: The Approach of Orthopaedic and Dental Physicians to Antibiotic Prophylaxis for Patients who have Undergone Total Knee or Total Hip Arthroplasty
Source: Research Square preprint supplement (doi:10.21203/rs.3.rs-6748709/v1), 2025-06-26
Supplement: Supplementary file 1 [file 5e5f0510ed054462426a8117.docx]

| Table 1:Comparison of professional title with years of practice , invasive procedure and consultation frequency | | | | | | | | |  |
| --- | --- | --- | --- | --- | --- | --- | --- | --- | --- |
|  |  | 1. What is your professional title? | | | | |  |  |  |
|  |  |  | Dentist | Specialist Dentist | Orthopedics and Traumatology Specialist | | Total |  |  |
|  |  |  |  |  |
| 2. How many years have you been working in your profession ? | <5 | n | 41 | 65 | 45 |  | 151 |  |  |
| % | 39,4% | 44,5% | 21,4% |  | 32,8% |  |  |
| 5­-10 | n | 17 | 45 | 85 |  | 147 |  |  |
| % | 16,3% | 30,8% | 40,5% |  | 32,0% |  |  |
| >10 | n | 46 | 36 | 80 |  | 162 |  |  |
| % | 44,2% | 24,7% | 38,1% |  | 35,2% |  |  |
|  |  |  |  |  |  |  |  |  |  |
| 3. For dentists; invasive procedures such as gingival or periapical tissue manipulation or oral mucosa perforations; For orthopedic doctors; total hip arthroplasty or total hip arthroplasty surgeries; how many times a year do you perform on average ? | <50 | n | 72 | 71 | 117 |  | 260 |  |  |
| % | 69,2% | 48,6% | 55,7% |  | 56,5% |  |  |
| 50-100 | n | 13 | 16 | 64 |  | 93 |  |  |
| % | 12,5% | 11,0% | 30,5% |  | 20,2% |  |  |
| >100 | n | 19 | 59 | 29 |  | 107 |  |  |
| % | 18,3% | 40,4% | 13,8% |  | 23,3% |  |  |
|  |  |  |  |  |  |  |  |  |  |
| 4. For dentists, have you ever sought orthopedic consultation for antibiotic prophylaxis before invasive dental treatments for patients who have had total hip arthroplasty or total knee arthroplasty surgery ? For orthopedic surgeons; have patients who have had total hip arthroplasty or total knee arthroplasty surgery been consulted by a dentist for antibiotic prophylaxis before invasive dental treatments ? | No | n | 69 | 59 | 115 |  | 243 |  |  |
| % | 66,3% | 40,4% | 54,8% |  | 52,8% |  |  |
| Yes 1-2 | n | 19 | 32 | 53 |  | 104 |  |  |
| % | 18,3% | 21,9% | 25,2% |  | 22,6% |  |  |
| Yes 3-10 | n | 10 | 26 | 27 |  | 63 |  |  |
| % | 9,6% | 17,8% | 12,9% |  | 13,7% |  |  |
| Yes>10 | n | 6 | 29 | 15 |  | 50 |  |  |
| % | 5,8% | 19,9% | 7,1% |  | 10,9% |  |  |
|  |  |  |  |  |  |  |  |  |
| Total | | n | 104 | 146 | 210 |  | 460 |  |  |
| % | 100,0% | 100,0% | 100,0% |  | 100,0% |  |  |

| Table 2: Comparison of the number of consultations with years of professional experience and the number of invasive procedures | | | | | | | |
| --- | --- | --- | --- | --- | --- | --- | --- |
|  |  |  | No | Yes 1-2 | Yes 3-10 | Yes >10 | Total |
| 1. How many years have you been working in your profession ? | <5 | n | 75 | 42 | 21 | 13 | 151 |
| % | 49,7% | 27,8% | 13,9% | 8,6% | 100,0% |
| 5­10 | n | 81 | 32 | 18 | 16 | 147 |
| % | 55,1% | 21,8% | 12,2% | 10,9% | 100,0% |
| >10 | n | 87 | 30 | 24 | 21 | 162 |
| % | 53,7% | 18,5% | 14,8% | 13,0% | 100,0% |
|  |  |  |  |  |  |  |  |
| 2. For dentists; invasive procedures such as gingival or periapical tissue manipulation or oral mucosa perforations; For orthopedic doctors; total hip arthroplasty or total knee arthroplasty surgeries; how many times a year do you perform on average ? | <50 | n | 151 | 64 | 24 | 21 | 260 |
| % | 58,1% | 24,6% | 9,2% | 8,1% | 100,0% |
| 50-100 | n | 44 | 28 | 16 | 5 | 93 |
| % | 47,3% | 30,1% | 17,2% | 5,4% | 100,0% |
| >100 | n | 48 | 12 | 23 | 24 | 107 |
| % | 44,9% | 11,2% | 21,5% | 22,4% | 100,0% |
|  |  |  |  |  |  |  |
| Total | | n | 243 | 104 | 63 | 50 | 460 |
| % | 52,8% | 22,6% | 13,7% | 10,9% | 100,0% |

| Table 3: Questions and comparison of answers given by dentists and orthopedic surgeons to questions (q1-10) | | | | | | |  |
| --- | --- | --- | --- | --- | --- | --- | --- |
|  |  | Dentist | | Orthopedics and Traumatology Specialist | |  |  |
|  |  |  | p value |
|  |  | Total |
| 1. A treatment for dental scaling, not affecting the gingiva, is planned for a healthy 63-year-old man. The patient who underwent a total hip arthroplasty two years ago and has experienced no complications to date. What is your opinion on using antibiotic prophylaxis as a treatment? | rarely appropriate | n | 193a | 113b |  | 306 | ***<0,001*** |
| % | **77,2%** | **53,8%** |  | 66,5% |
|  |  |  |  |  |  |
| may be appropriate | n | 43a | 49a |  | 92 |
| % | 17,2% | 23,3% |  | 20,0% |
|  |  |  |  |  |  |
| appropriate | n | 14a | 48b |  | 62 |
| % | **5,6%** | **22,9%** |  | 13,5% |
|  |  |  |  |  |  |  |
| 2. A treatment for dental scaling , which does not extend to the gums, is planned for a 63-year-old healthy man patient. This patient has a history of undergoing secondary surgery due to periprosthetic joint infection in the postoperative period following total hip arthroplasty 10 months ago, and he has an HbA1c level of 9. What is your recommendation regarding antibiotic prophylaxis? | rarely appropriate | n | 42a | 29a |  | 71 | 0,171 |
| % | 16,8% | 13,8% |  | 15,4% |
|  |  |  |  |  |  |
| may be appropriate | n | 75a | 51a |  | 126 |
| % | 30,0% | 24,3% |  | 27,4% |
|  |  |  |  |  |  |
| appropriate | n | 133a | 130a |  | 263 |
| % | 53,2% | 61,9% |  | 57,2% |
|  |  |  |  |  |  |  |
| 3. Periapical dental surgery is scheduled for a 60-year-old HIV-positive woman patient who underwent total hip arthroplasty 8 months ago. What is your recommendation regarding antibiotic prophylaxis? | rarely appropriate | n | 33a | 29a |  | 62 | ***0,024*** |
| % | 13,2% | 13,8% |  | 13,5% |
|  |  |  |  |  |  |
| may be appropriate | n | 79a | 43b |  | 122 |
| % | **31,6%** | **20,5%** |  | 26,5% |
|  |  |  |  |  |  |
| appropriate | n | 138a | 138b |  | 276 |
| % | **55,2%** | **65,7%** |  | 60,0% |
|  |  |  |  |  |  |  |
| 4. A 60-year-old HIV-positive woman is scheduled for periapical dental surgery. She had a total hip arthroplasty eight months ago, which was followed by a secondary surgery due to prosthetic joint infection. The patient also has a history of poorly controlled diabetes mellitus, with an HbA1c level greater than 8. What recommendations can you provide regarding antibiotic prophylaxis for this patient? | rarely appropriate | n | 16a | 8a |  | 24 | 0,457 |
| % | 6,4% | 3,8% |  | 5,2% |
|  |  |  |  |  |  |
| may be appropriate | n | 37a | 31a |  | 68 |
| % | 14,8% | 14,8% |  | 14,8% |
|  |  |  |  |  |  |
| appropriate | n | 197a | 171a |  | 368 |
| % | 78,8% | 81,4% |  | 80,0% |
|  |  |  |  |  |  |  |
| 5. A dental filling is planned for a healthy 65-year-old woman. Eleven months after a total knee arthroplasty, she developed a prosthetic joint infection and underwent secondary surgery. What is your recommendation regarding antibiotic prophylaxis? | rarely appropriate | n | 129a | 25b |  | 154 | ***<0,001*** |
| % | **51,6%** | **11,9%** |  | 33,5% |
|  |  |  |  |  |  |
| may be appropriate | n | 92a | 60a |  | 152 |
| % | 36,8% | 28,6% |  | 33,0% |
|  |  |  |  |  |  |
| appropriate | n | 29a | 125b |  | 154 |
| % | **11,6%** | **59,5%** |  | 33,5% |
|  |  |  |  |  |  |  |
| 6. A gingival flap operation is planned for a healthy 65-year-old woman. Eleven months ago, during the postoperative period of a total knee arthroplasty operation, she developed a prosthetic joint infection and underwent secondary surgery. What are your recommendations for antibiotic prophylaxis in this case? | rarely appropriate | n | 20a | 13a |  | 33 | 0,226 |
| % | 8,0% | 6,2% |  | 7,2% |
|  |  |  |  |  |  |
| may be appropriate | n | 55a | 35a |  | 90 |
| % | 22,0% | 16,7% |  | 19,6% |
|  |  |  |  |  |  |
| appropriate | n | 175a | 162a |  | 337 |
| % | 70,0% | 77,1% |  | 73,3% |
|  |  |  |  |  |  |  |
| 7. A 72-year-old man underwent total knee arthroplasty three years ago. After receiving seven days of antibiotic treatment for an infected molar tooth, the patient came to the clinic for extraction. His medical history includes hypertension, dyslipidemia, and active diabetes (HbA1c = 8.5). He also received a kidney transplant two months ago and has a history of immunosuppressive drug use. What is your recommendation regarding antibiotic prophylaxis in this case? | rarely appropriate | n | 33a | 11b |  | 44 | ***0,015*** |
| % | **13,2%** | **5,2%** |  | 9,6% |
|  |  |  |  |  |  |
| may be appropriate | n | 45a | 43a |  | 88 |
| % | 18,0% | 20,5% |  | 19,1% |
|  |  |  |  |  |  |
| appropriate | n | 172a | 156a |  | 328 |
| % | 68,8% | 74,3% |  | 71,3% |
|  |  |  |  |  |  |
| 8. A 72-year-old healthy man underwent total knee arthroplasty 8 months ago. After receiving 7 days of antibiotic treatment for an infected molar tooth, the patient visited the clinic to request a tooth extraction. What is your recommendation regarding antibiotic prophylaxis? | rarely appropriate | n | 89a | 41b |  | 130 | ***<0,001*** |
| % | **35,6%** | **19,5%** |  | 28,3% |
|  |  |  |  |  |  |
| may be appropriate | n | 93a | 55b |  | 148 |
| % | **37,2%** | **26,2%** |  | 32,2% |
|  |  |  |  |  |  |
| appropriate | n | 68a | 114b |  | 182 |
| % | **27,2%** | **54,3%** |  | 39,6% |
|  |  |  |  |  |  |  |
| 9. A 68-year-old woman patient visited the clinic for treatment of dental erosion. Her medical history includes hip necrosis, which developed due to the use of immunosuppressive drugs following liver transplantation. Two years ago, she underwent a successful total hip arthroplasty without complications due to hip necrosis. The patient also has active diabetes, but her most recent HbA1c value is unknown. What is your recommendation regarding antibiotic prophylaxis? | rarely appropriate | n | 100a | 27b |  | 127 | ***<0,001*** |
| % | **40,0%** | **12,9%** |  | 27,6% |
|  |  |  |  |  |  |
| may be appropriate | n | 103a | 91a |  | 194 |
| % | 41,2% | 43,3% |  | 42,2% |
|  |  |  |  |  |  |
| appropriate | n | 47a | 92b |  | 139 |
| % | **18,8%** | **43,8%** |  | 30,2% |
|  |  |  |  |  |  |
| 10. A 68-year-old woman patient arrived at the clinic for implant surgery due to tooth loss. Her medical history includes hip necrosis, which developed from the use of immunosuppressive drugs following her liver transplantation. Two years ago, she successfully underwent a total hip arthroplasty to address the hip necrosis without any complications. Additionally, the patient has active diabetes, but her most recent HbA1c level is unknown. What recommendations do you have regarding antibiotic prophylaxis for this patient? | rarely appropriate | n | 12a | 5a |  | 17 | 0,207 |
| % | 4,8% | 2,4% |  | 3,7% |
|  |  |  |  |  |  |
| may be appropriate | n | 62a | 44a |  | 106 |
| % | 24,8% | 21,0% |  | 23,0% |
|  |  |  |  |  |  |
| appropriate | n | 176a | 161a |  | 337 |
| % | 70,4% | 76,7% |  | 73,3% |
|  |  |  |  |  |  |  |
| Total | | n | 250 | 210 |  | 460 |  |
| % | 100,0% | 100,0% |  | 100,0% |  |
| Test: Pearson Chi-Square |  |  |  |  |  |  |  |
