# Supplementary material for: The Approach of Orthopaedic and Dental Physicians to Antibiotic Prophylaxis for Patients who have Undergone Total Knee or Total Hip Arthroplasty
Source: Research Square preprint supplement (doi:10.21203/rs.3.rs-6748709/v1), 2025-06-26
Supplement: Supplementary file 2 [file ce5694a7075bf860ab5d22a6.docx]

| 1. What is your professional title? |
| --- |
| Dentist |
| Specialist Dentist |
| Orthopedic Specialist |

| 2. 1. What is your professional title? (For specialist dentists) |
| --- |
| Oral, Dental and Maxillofacial Surgery |
| Oral, Dental and Maxillofacial Radiology |
| Pedodontics |
| Endodontics |
| Periodontology |
| Prosthetic Dentistry |
| Restorative Dentistry |

| 3. How many years have you been working in your profession ? | | |
| --- | --- | --- |
| < 5 years | 5- 10 years | >10 years |

| 4. For dentists; invasive procedures such as gingival or periapical tissue manipulation or oral mucosa perforations; For orthopedic doctors; total hip arthroplasty or total knee arthroplasty surgeries; how many times a year do you perform on average ? | | |
| --- | --- | --- |
| < 50 | 51-100 | >100 |

| 5. For dentists, have you ever sought orthopedic consultation for antibiotic prophylaxis before invasive dental treatments for patients who have had total hip arthroplasty or total knee arthroplasty surgery ? For orthopedic surgeons; have patients who have had total hip arthroplasty or total knee arthroplasty surgery been consulted by a dentist for antibiotic prophylaxis before invasive dental treatments ? | | | |
| --- | --- | --- | --- |
| none | Yes 1 or 2 times | Yes 3-10 times | Yes more than 10 times |

In the following possible scenarios, please mark the option closest to antibiotic prophylaxis..

Rarely Appropriate=R: The procedure is not generally acceptable and not generally reasonable for indication. Exceptions must have documented clinical reasons for continuing with this care option. It is a rarely appropriate option for the management of this patient population because there is no clear benefit/risk advantage, and it is a rarely effective option for individual care plans.

May Be Appropriate=M: This means that it is uncertain for the indication provided, in other words, the treatment is acceptable and it may be a reasonable approach for the indication, but there is a need for further investigation and/or patient information to better classify the indication.

Appropriate=A: The indication provided is appropriate, in other words, the treatment is generally acceptable and it is a reasonable approach for the indication, and there is a high probability of healthy outcomes or improved survival of the patient.

|  | Rarely Appropriate | May Be Appropriate | Appropriate |
| --- | --- | --- | --- |
| 1.A treatment for dental scaling, not affecting the gingiva, is planned for a healthy 63-year-old man. The patient who underwent a total hip arthroplasty two years ago and has experienced no complications to date. What is your opinion on using antibiotic prophylaxis as a treatment? |  |  |  |
| 2. A treatment for dental scaling , which does not extend to the gums, is planned for a 63-year-old healthy man patient. This patient has a history of undergoing secondary surgery due to periprosthetic joint infection in the postoperative period following total hip arthroplasty 10 months ago, and he has an HbA1c level of 9. What is your recommendation regarding antibiotic prophylaxis? |  |  |  |
| 3. Periapical dental surgery is scheduled for a 60-year-old HIV-positive woman patient who underwent total hip arthroplasty 8 months ago. What is your recommendation regarding antibiotic prophylaxis? |  |  |  |
| 4. A 60-year-old HIV-positive woman is scheduled for periapical dental surgery. She had a total hip arthroplasty eight months ago, which was followed by a secondary surgery due to prosthetic joint infection. The patient also has a history of poorly controlled diabetes mellitus, with an HbA1c level greater than 8. What recommendations can you provide regarding antibiotic prophylaxis for this patient? |  |  |  |
| 5. A dental filling is planned for a healthy 65-year-old woman. Eleven months after a total knee arthroplasty, she developed a prosthetic joint infection and underwent secondary surgery. What is your recommendation regarding antibiotic prophylaxis? |  |  |  |
| 6. A gingival flap operation is planned for a healthy 65-year-old woman. Eleven months ago, during the postoperative period of a total knee arthroplasty operation, she developed a prosthetic joint infection and underwent secondary surgery. What are your recommendations for antibiotic prophylaxis in this case? |  |  |  |
| 7. A 72-year-old man underwent total knee arthroplasty three years ago. After receiving seven days of antibiotic treatment for an infected molar tooth, the patient came to the clinic for extraction. His medical history includes hypertension, dyslipidemia, and active diabetes (HbA1c = 8.5). He also received a kidney transplant two months ago and has a history of immunosuppressive drug use. What is your recommendation regarding antibiotic prophylaxis in this case? |  |  |  |
| 8. A 72-year-old healthy man underwent total knee arthroplasty 8 months ago. After receiving 7 days of antibiotic treatment for an infected molar tooth, the patient visited the clinic to request a tooth extraction. What is your recommendation regarding antibiotic prophylaxis? |  |  |  |
| 9. A 68-year-old woman patient visited the clinic for treatment of dental erosion. Her medical history includes hip necrosis, which developed due to the use of immunosuppressive drugs following liver transplantation. Two years ago, she underwent a successful total hip arthroplasty without complications due to hip necrosis. The patient also has active diabetes, but her most recent HbA1c value is unknown. What is your recommendation regarding antibiotic prophylaxis? |  |  |  |
| 10. A 68-year-old woman patient arrived at the clinic for implant surgery due to tooth loss. Her medical history includes hip necrosis, which developed from the use of immunosuppressive drugs following her liver transplantation. Two years ago, she successfully underwent a total hip arthroplasty to address the hip necrosis without any complications. Additionally, the patient has active diabetes, but her most recent HbA1c level is unknown. What recommendations do you have regarding antibiotic prophylaxis for this patient? |  |  |  |
